# Supplementary material
Source: PubMed Central journal article supplement (PMC5777184)
Supplement: 2017_182675-Disclosures_and_Contributions.pdf [file 2017_182675-Disclosures_and_Contributions.pdf]

Haematologica  
HAEMATOL/2017/182675  
Version 1  
The SIRT6 role in tumors

Vanessa Desantis, Aurelia Lamanuzzi, and Angelo Vacca

Disclosures: All Authors declare no conflict of interest.

Contributions: Vanessa Desantis wrote the article and selected the literature; Aurelia Lamanuzzi wrote the article and selected the literature; Angelo Vacca wrote and corrected the article.
